# Supplementary material for: A modified oncolytic measles virus exhibits strong immunotherapeutic potential through RIG-I activation by defective viral genomes
Source: Research Square preprint supplement (doi:10.21203/rs.3.rs-7774994/v1), 2025-11-24

FIGURE S1

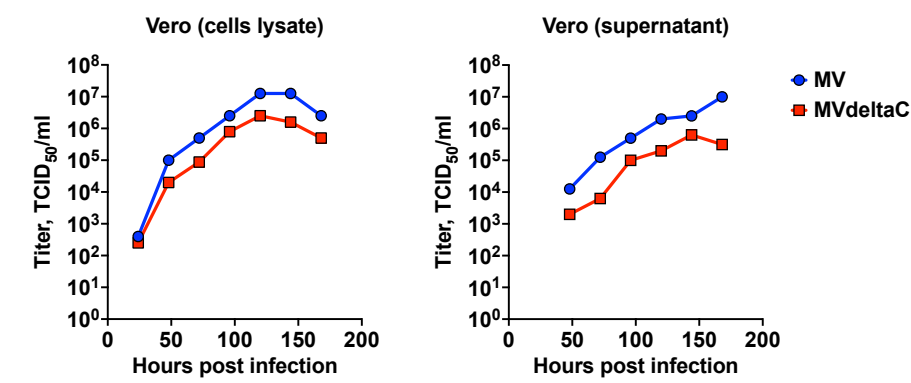

**Figure S1. Growth kinetics of MV and MVdeltaC on Vero cells.** Cells were infected at MOI 0.01 and incubated at 32°C. The data show reciprocal endpoint dilution titers of cell-associated (left) and cell-free (right) viruses.

**MVdeltaC P5**

Coverage depth (log X)

Genome position

iSNVs (%)

**MVdeltaC P10**

Coverage depth (log X)

Genome position

iSNVs (%)

**Protein Domain Diagram:**

N P/dC/V M F H L

1000 2000 3000 4000 5000 6000 7000 8000 9000 10000 11000 12000 13000 14000 15000

1830 (100% reads) acg ORF MVdC C: T

1863 (100% reads) taa stop

ORF MV Schwarz C: M S

original sequence atg tca

**Figure S2. Sequencing analysis of MVdeltaC passages.** Reads coverage and proportion of intrasample single nucleotide variants (iSNVs) obtained from next-generation sequencing of MVdeltaC at passages 5 (P5) and 10 (P10). A schematic of the measles virus genome is shown below using the same scale, with the two engineered mutations preventing C protein expression highlighted. No sequence changes were detected at either of these positions in P5 or P10 samples.

FIGURE S3

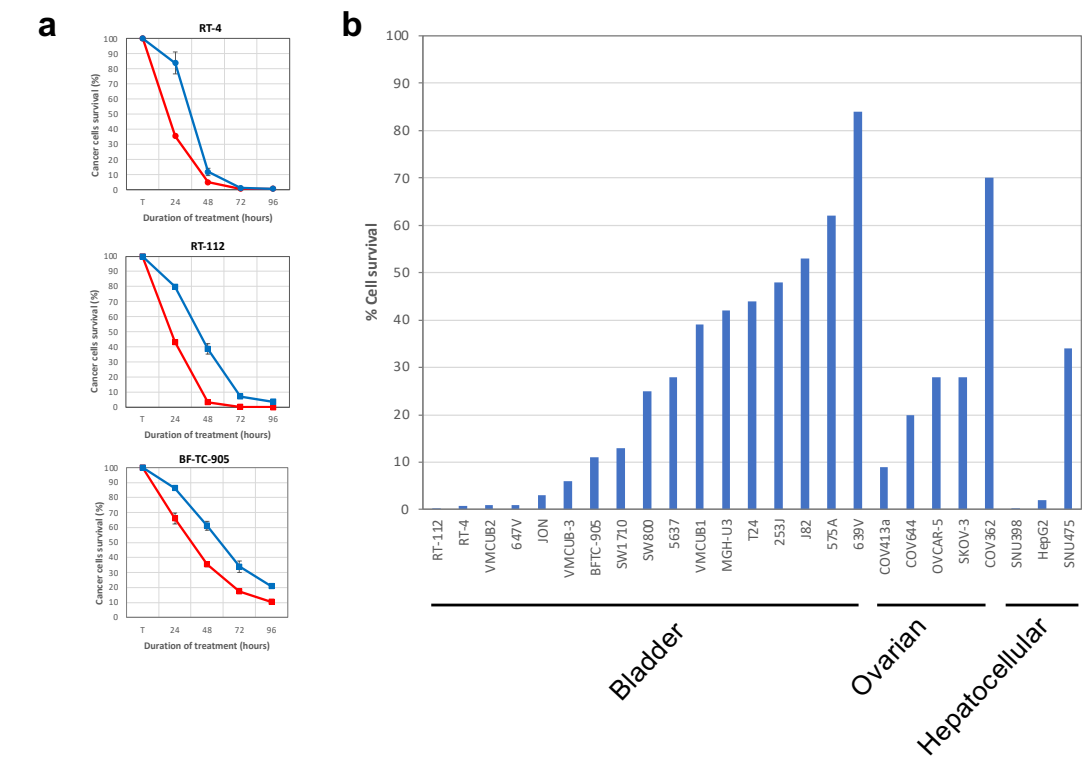

**Figure S3. Infection and killing of human cancer cells by MVdeltaC.** (a) Cell survival of three human bladder cancer cell lines after infection with MV (blue) or MVdeltaC (red) at MOI 5, measured by CellTiter-Glo assay; means  $\pm$  SD; measurements are in triplicate; data normalized to non-infected cells. (b) MVdeltaC killing of a series of human cancer cells of bladder, ovarian or hepatocellular origin as determined by CellTiterGlo assay (cancer cells survival after 72 hours of infection at MOI 5).

FIGURE S4

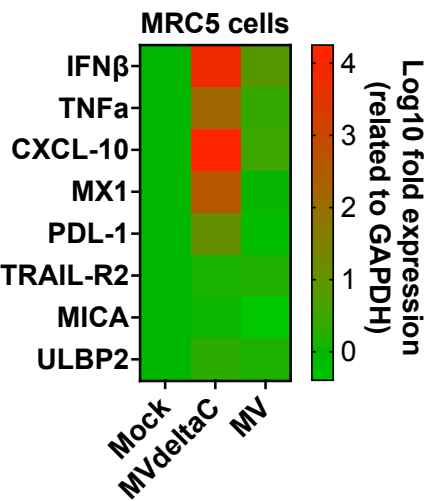

**Figure S4. Gene expression analysis in infected MRC5 cells.** Heatmap of differentially expressed genes in MRC5 cells after 24h incubation with MV, MVdeltaC (MOI 1) or PBS (Mock); experiment in triplicate, a gradient of colors from green to red represent log<sub>10</sub> fold change values from lowest to highest, respectively.

**FIGURE S5**

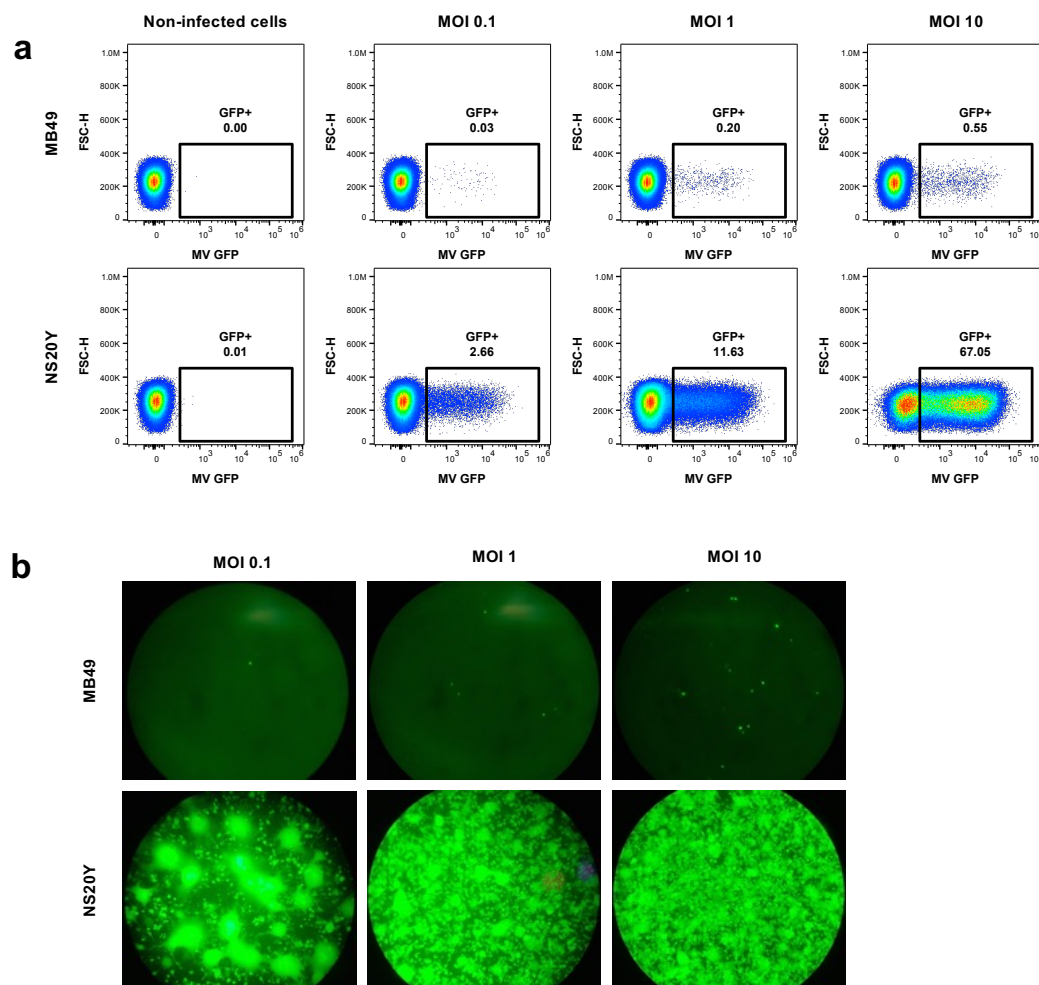

**Figure S5. NS20Y cells are permissive to measles infection.** Mouse neuroblastoma NS20Y cells and bladder carcinoma MB49 cells were infected with MV-eGFP at the indicated MOI and analyzed by (a) flow cytometry 24 hours post-infection, and (b) immunofluorescence microscopy 72 h hours post-infection.

**FIGURE S6**

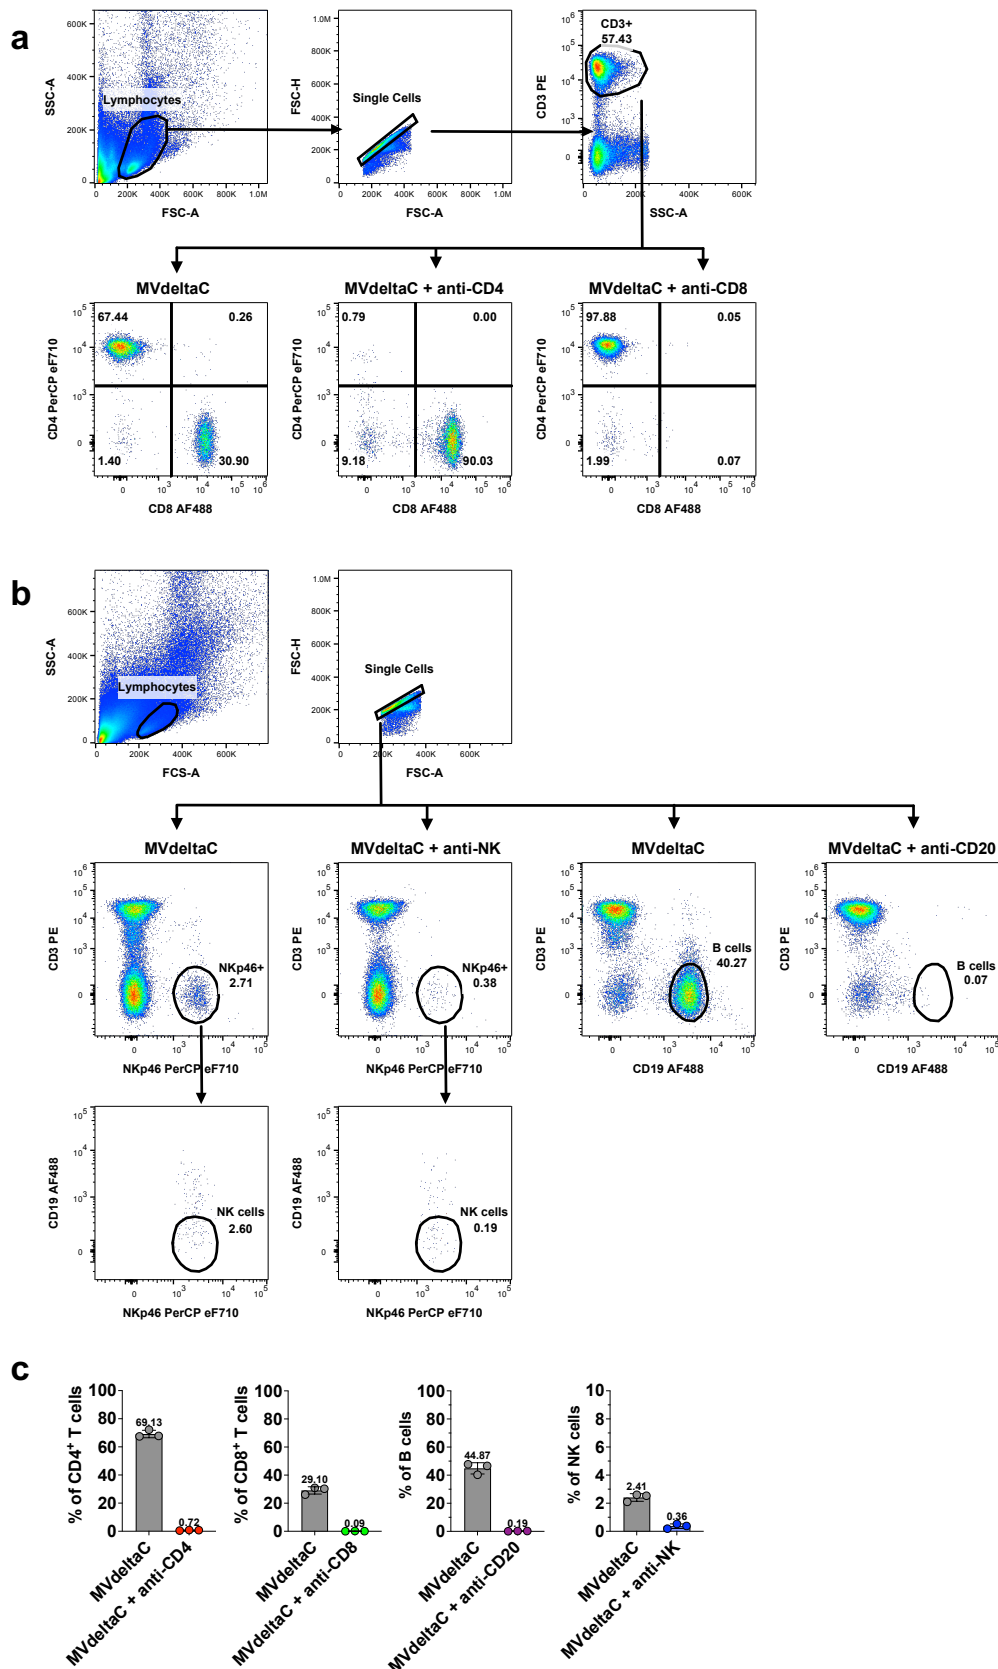

**Figure S6. Flow cytometry analysis of immune cell populations in the blood of A/J mice depleted for CD4<sup>+</sup>, CD8<sup>+</sup>, B or NK cells.** (a) Representative dot plots show the flow cytometry gating strategy to identify CD4<sup>+</sup> (CD3<sup>+</sup> CD4<sup>+</sup> CD8<sup>-</sup>), CD8<sup>+</sup> (CD3<sup>+</sup> CD8<sup>+</sup> CD4<sup>-</sup>) or (b) NK (CD3<sup>-</sup> NKp46<sup>+</sup> CD19<sup>-</sup>) and B (CD3<sup>-</sup> CD19<sup>+</sup>) cell populations in the blood of treated mice. Mice were grafted with  $5 \times 10^6$  NS20Y murine tumor cells on day 0. T cell depletion was achieved by i.p. injection of anti-CD4 or anti-CD8 mAbs (200  $\mu$ g in 100  $\mu$ L of PBS) on days 5, 6 and 7 after NS20Y cells injection. NK or B cell depletion was performed on days 5 and 7 using 50  $\mu$ g of anti-asialo GM1 or 200  $\mu$ g of anti-CD20 antibodies, respectively. Sustained immune cell depletion was achieved by weekly antibody administrations on days 14 and 21. Tumor therapy with MVdeltaC at  $2 \times 10^6$  TCID<sub>50</sub> was performed on days 6, 9 and 12. Immune cell populations in the groups of A/J mice were analyzed on day 27. (c) Bar graphs show flow cytometry data for the three animals from each group, means  $\pm$  SD.

**FIGURE S7**

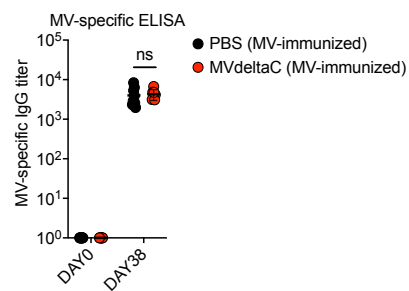

**Figure S7. MV-specific IgG antibody responses in A/J mice following MV Schwarz vaccination.** Mice were immunized i.p. with MV Schwarz ( $1 \times 10^5$  TCID<sub>50</sub>) on day 0. Sera were collected at day 38 post-immunization and assessed for IgG antibody responses to MV antigens by ELISA. The data show the reciprocal endpoint dilution titers of MV-specific IgG antibodies in preimmune (day 0) and day 38 sera; each point represents an individual mouse; means  $\pm$  SD, n= 7-9 per group; unpaired two-tailed t test; ns, not significant.

**FIGURE S8**

**a**

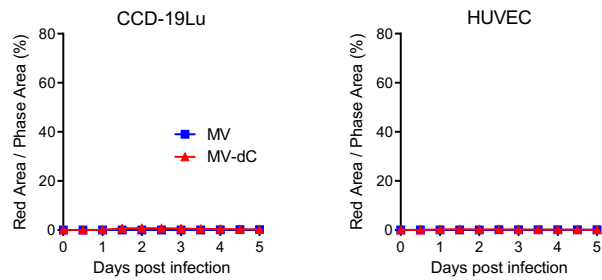

**b**

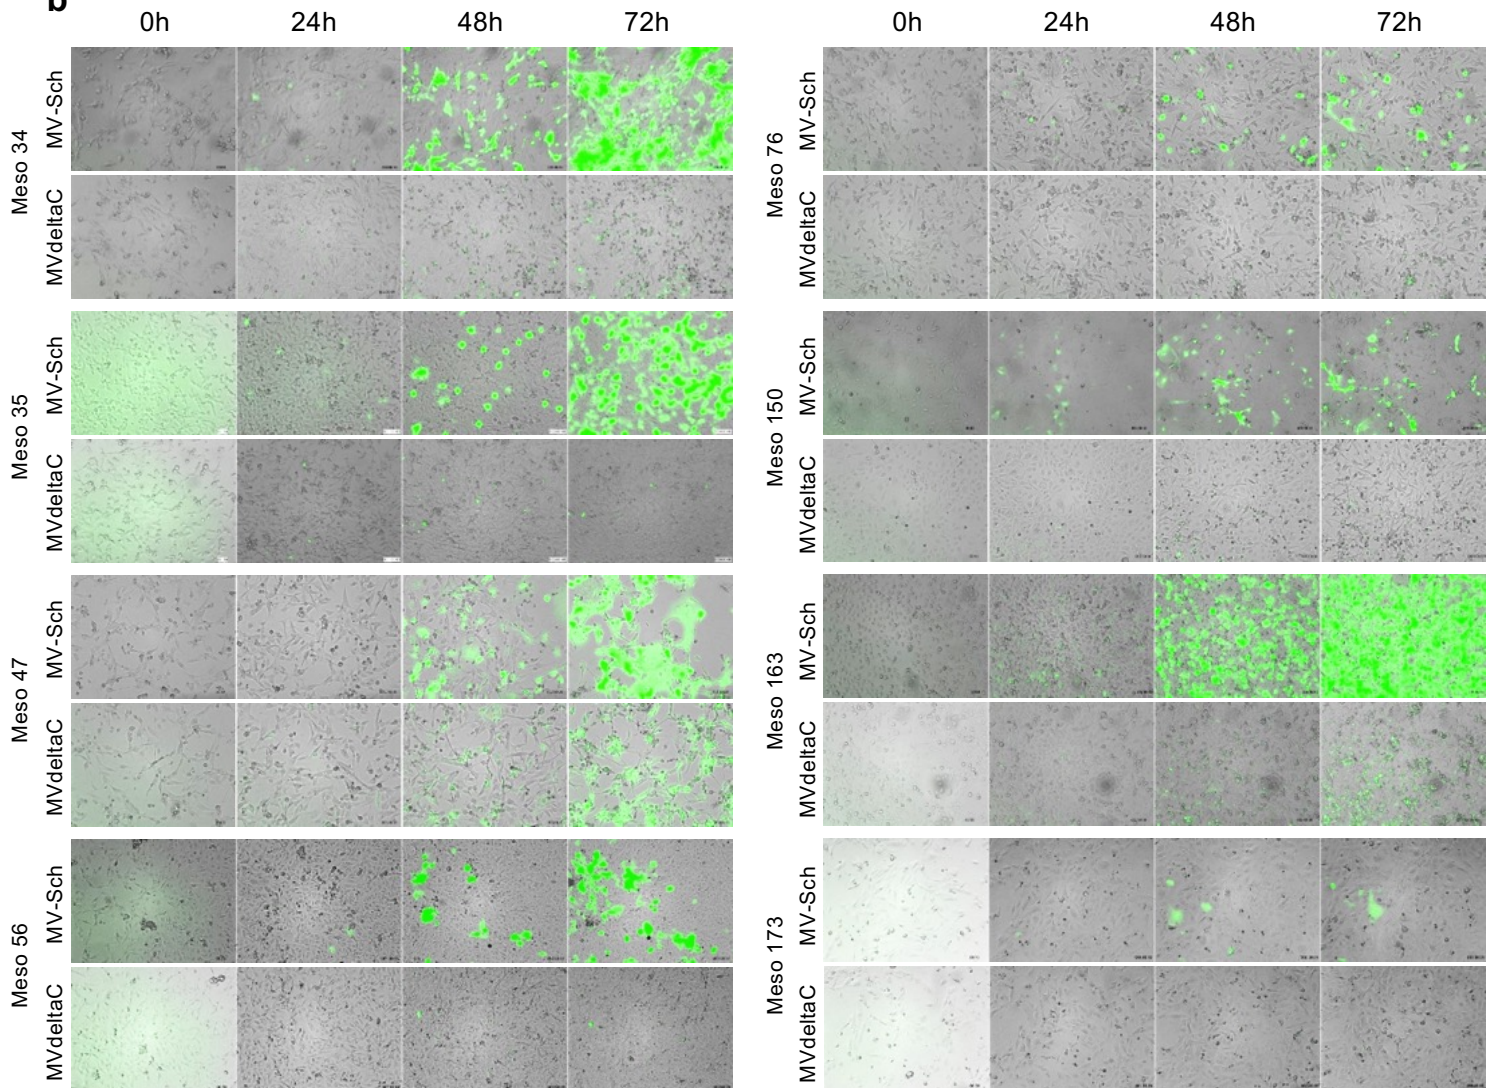

**Figure S8. Infection of healthy and cancer human cells by MV or MVdeltaC.** (a) Quantification of virus propagation in healthy lung fibroblasts (CCD19-Lu) or endothelial cells (HUVECs) infected with either MV-mCherry or MVdeltaC-mCherry. (b) Time-lapse microscopy analysis of mesothelioma cell lines infected with MV-eGFP or MVdeltaC-eGFP (MOI = 1).



# VIDEOS MESO13

**Figure S9. Infection of Meso 13 mesothelioma cells by MV or MVdeltaC.**

Time-lapse microscopy analysis of mesothelioma cell lines infected with MV-eGFP (a) or MVdeltaC-eGFP (b) (MOI = 1).

FIGURE S10

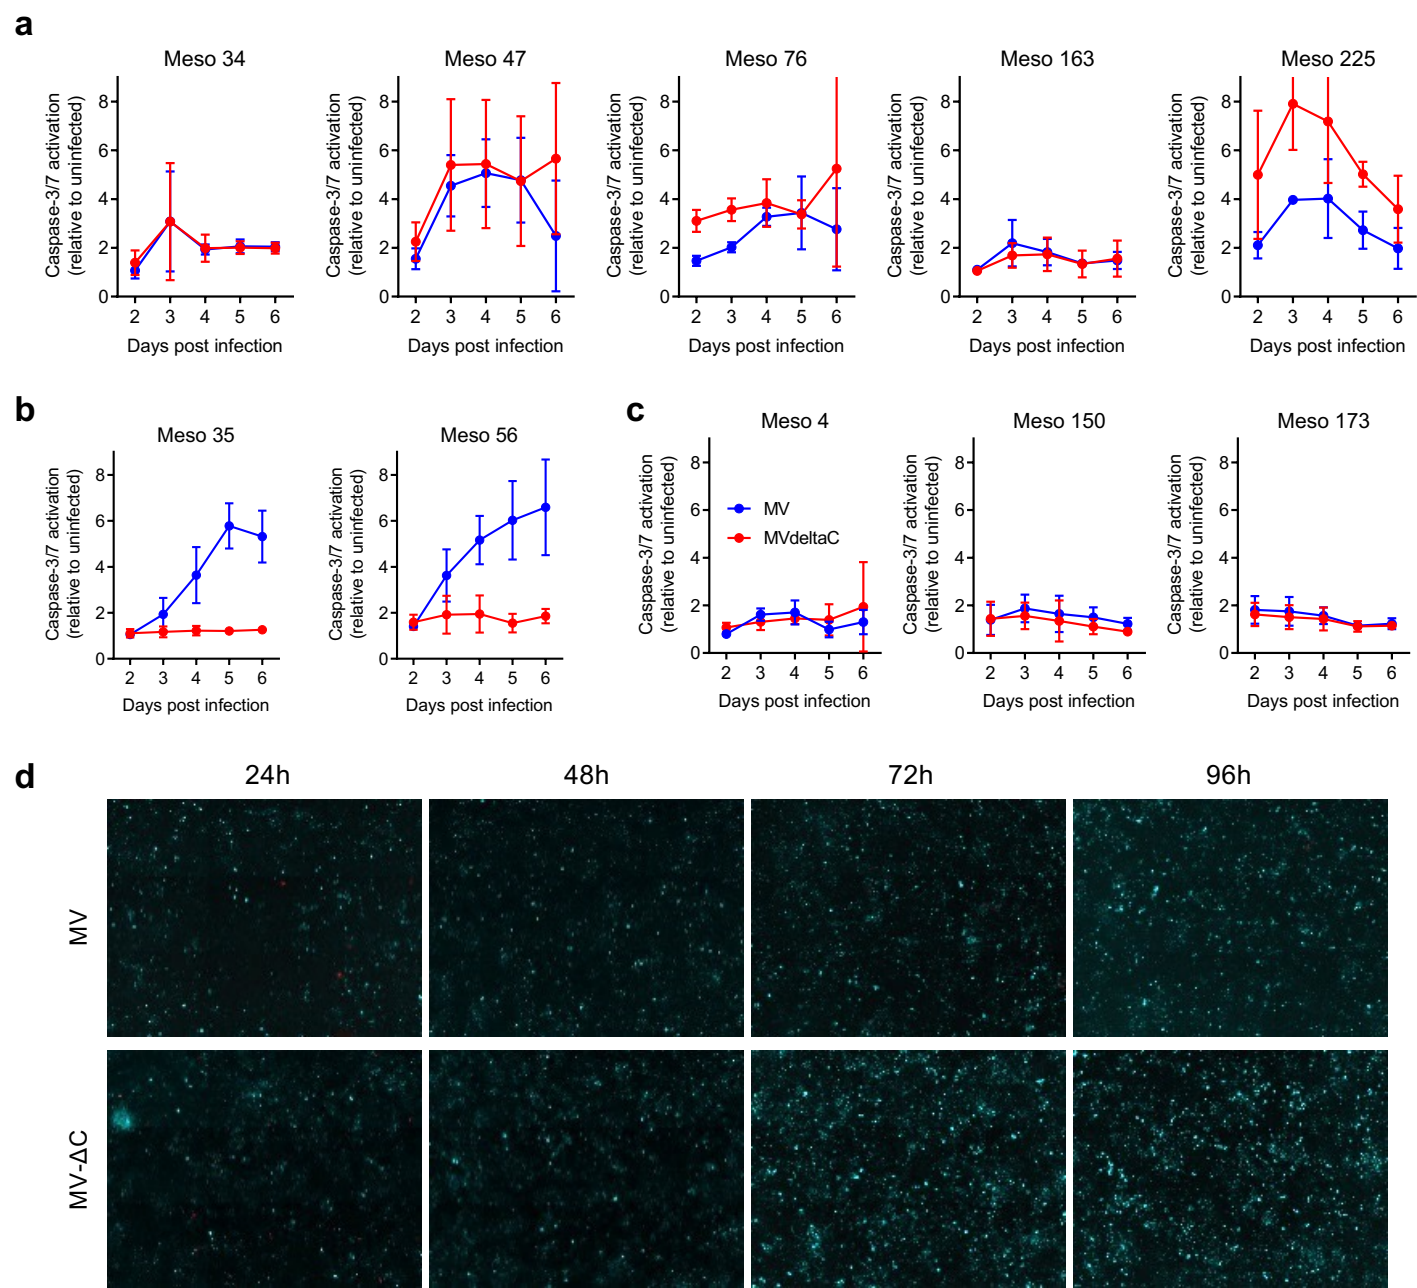

**Figure S10. Activation of Caspases-3/7 in mesothelioma cells infected by MVdeltaC.** (a-c) Luminescence-based quantification of caspase-3/7 activity in human mesothelioma cell lines. (a) MV-permissive, (b) MVdeltaC-resistant, and (c) MV-resistant cells. (d) Fluorescence microscopy of Meso 4 cells showing caspase-3/7 activation (cyan) after infection with MV-mCherry or MVdeltaC-mCherry (red).

FIGURE S11

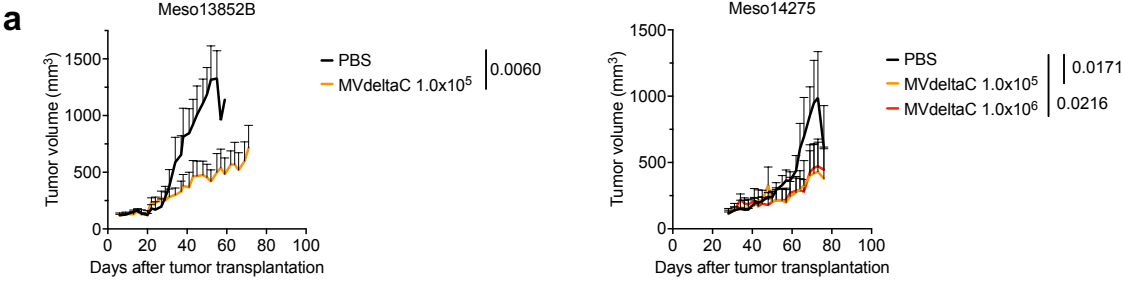

**Figure S11. MVdeltaC inhibits human PDX growth in immunodeficient mice.** Growth of mesothelioma PDX tumors in NMRI nu/nu mice after weekly MVdeltaC therapy at two doses; means  $\pm$  SEM,  $n = 3$  mice per group; each group was compared to PBS group (unpaired one-tailed  $t$  test).

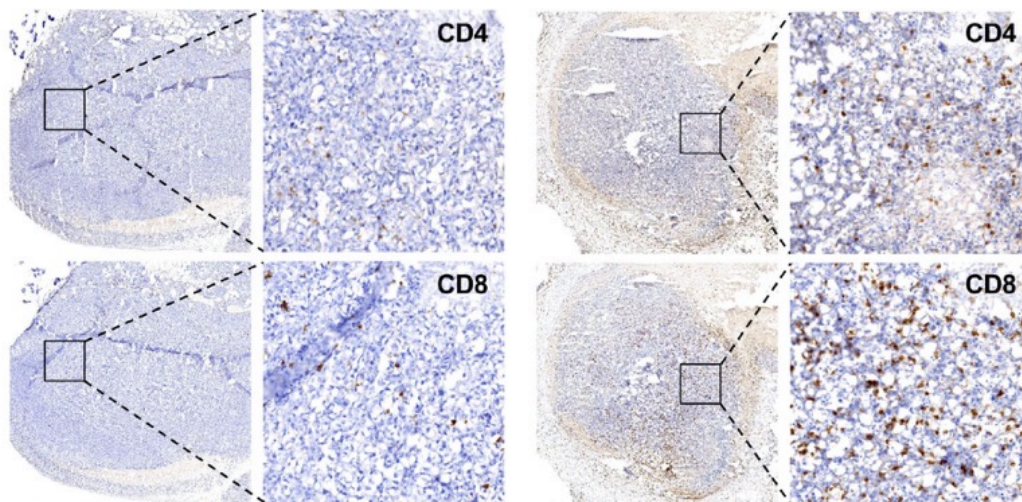

PBS

MVdeltaC

### Cold Tumor

### Hot Tumor

- Exclusion of CD8+ T cells and NK cells from the tumor
- Immunosuppressive immune cells in tumor (ie. Tregs)
- Poor prognosis and response to immunotherapy

- CD8+ T cells and NK cells are present in tumor
- Suppression of immunosuppressive cell types
- Improved prognosis

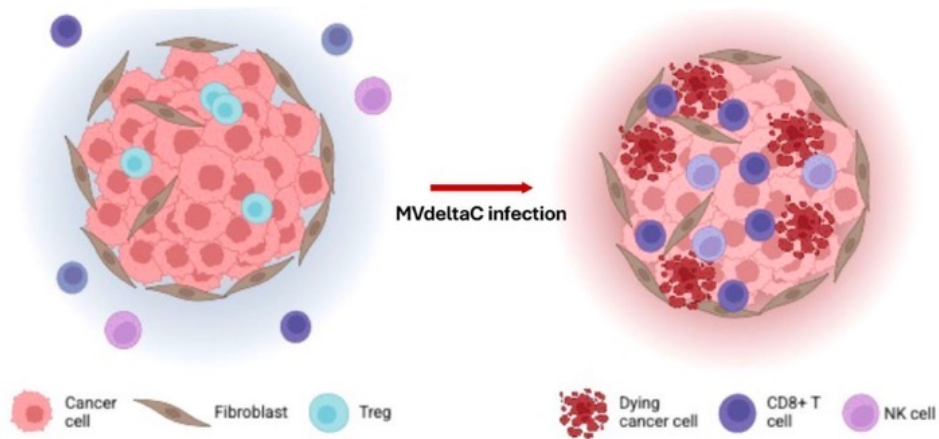

Supplement: Supplementary file 1 [file a46a8186aa6afb1c9fed42cf.pdf]
